# Supplementary material for: Ocular toxicity, distribution, and shedding of intravitreal AAV-eqIL-10 in horses
Source: PubMed Central journal article supplement (PMC11656199; doi:10.1016/j.omtm.2024.101360), 2024-10-28
Supplement: mmc1.pdf [file mmc1.pdf]

**OMTM, Volume 32**

**Supplemental information**

**Ocular toxicity, distribution, and shedding  
of intravitreal AAV-eqIL-10 in horses**

**Kim Young, Tomoko Hasegawa, Naveen Vridhachalam, Nichol Henderson, Jacklyn H. Salmon, Trace F. McCall, Matthew L. Hirsch, and Brian C. Gilger**

**Table S1.** Information on individual horses

| <b>Horse</b> | <b>Treatment group</b>      | <b>Age</b> | <b>Gender</b>       | <b>Breed</b>  | <b>Body weight (kg)</b> |
|--------------|-----------------------------|------------|---------------------|---------------|-------------------------|
| 1            | Vehicle control (V)         | 11 years   | Female              | Thoroughbred  | 507                     |
| 2            | Low dose AAV8-eqIL10 (LD1)  | 12 years   | Female              | Pony          | 413                     |
| 3            | Low dose AAV8-eqIL10 (LD2)  | 13 years   | Male<br>(castrated) | Thoroughbred  | 569                     |
| 4            | High dose AAV8-eqIL10 (HD1) | 20 years   | Female              | Quarter Horse | 399                     |
| 5            | High dose AAV8-eqIL10 (HD2) | 22 years   | Female              | Quarter Horse | 499                     |

**Table S2.** Neutralizing Antibody Testing.

| Horse | Serum neutralizing antibodies |                        |
|-------|-------------------------------|------------------------|
|       | Prior to injection            | Day 84 after injection |
| V     | Not detected                  | Not detected           |
| LD1   | Not detected                  | Not detected           |
| LD2   | Not detected                  | 4                      |
| HD1   | Not detected                  | 16                     |
| HD2   | Not detected                  | 16                     |

Tissue, aqueous and vitreous → viral genome distribution  
 Serum → neutralizing antibody testing  
 Aqueous, vitreous → IL-10 ELISA  
 Ocular tissue (unilateral) → histopathology and immunohistochemistry

**End point**  
 Samples: tears, serum, plasma, feces, urine, ocular examination, IOP  
***Euthanasia and necropsy***  
 Ocular tissue (bilateral), aqueous, vitreous, extraocular muscle, kidney, liver, brain, heart, spleen, brain, nasal mucosa, skeletal muscle, submandibular lymph node, gastrointestinal tract

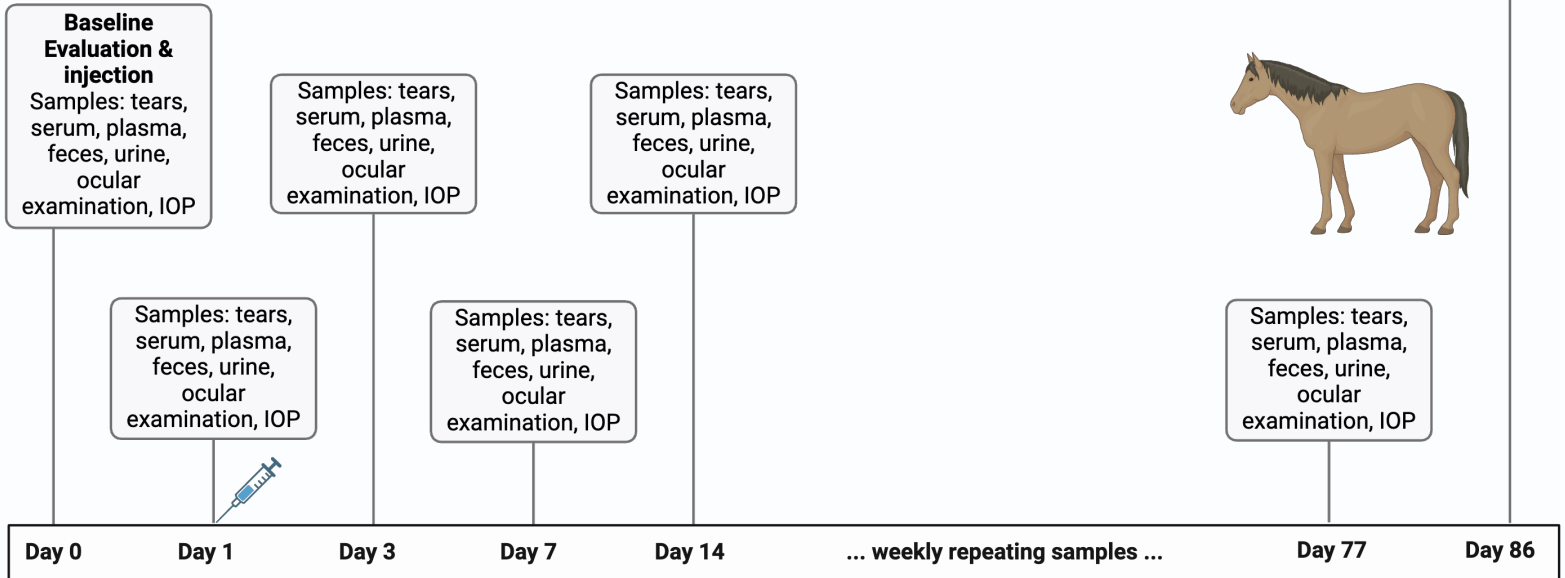

**Figure S1.** Sampling timeline and endpoint testing

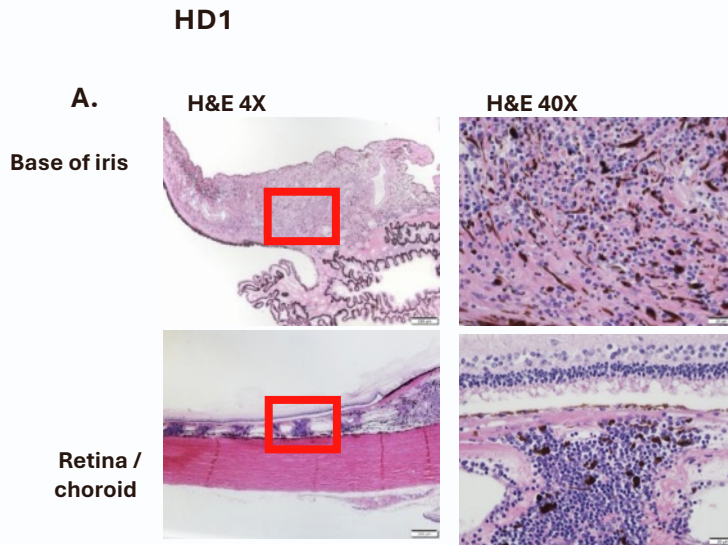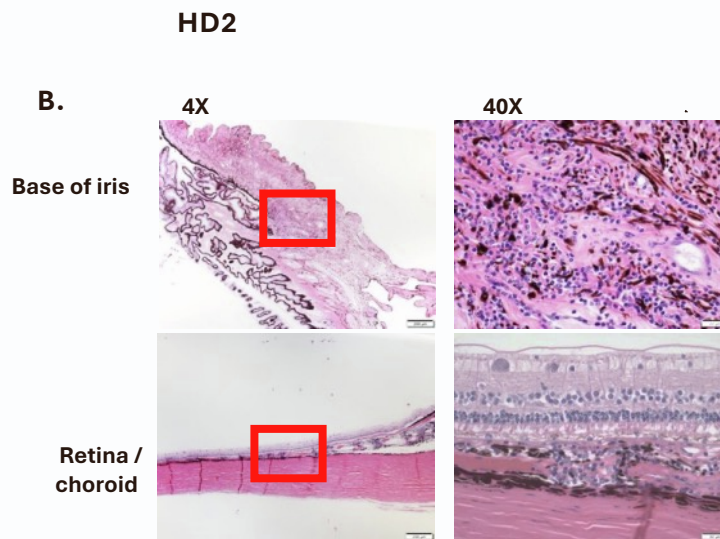

**Figure S2 A.** HD1. Ocular histology. In the iris and ciliary body (red box), there was diffuse infiltration of mononuclear cells in the iris and ciliary body (top row) and focal areas of mononuclear cells in the choroid (red box). **B.** HD2. Ocular histology. In the iris and ciliary body (red box), there was diffuse infiltration of mononuclear cells in the iris and ciliary body (top row) and focal areas of mononuclear cells in the choroid (red box).

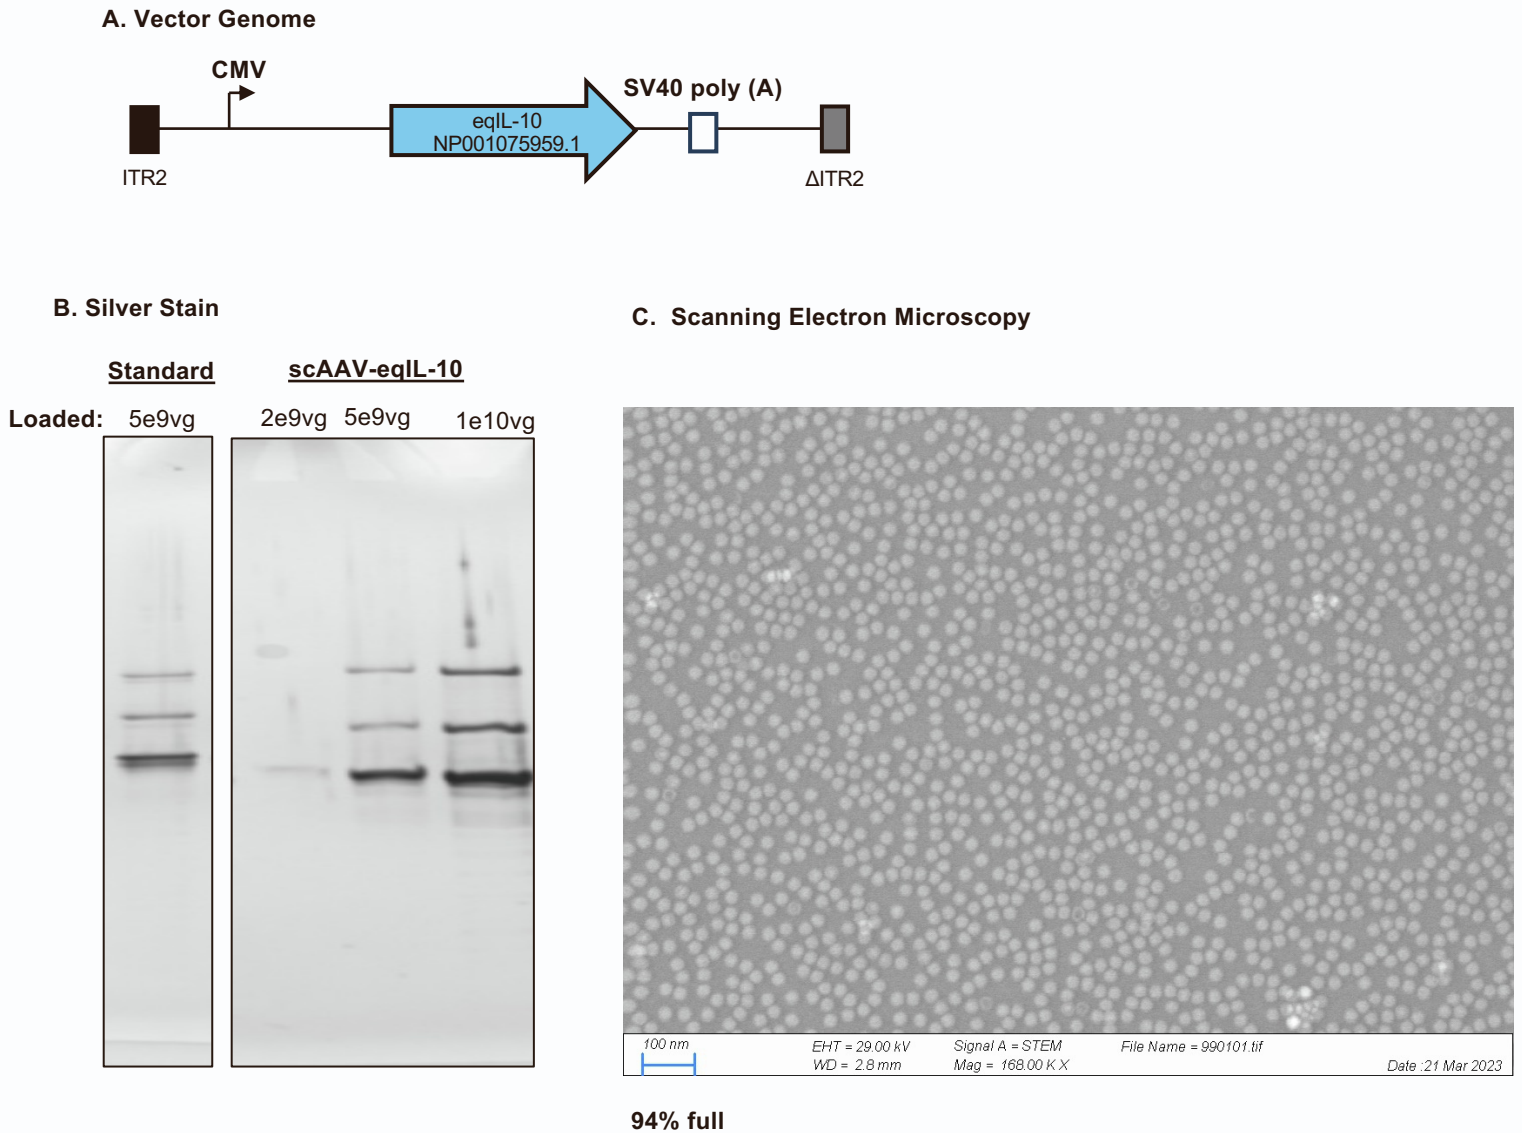

**Figure S3.** AAV8-eqIL-10 Characterization. **A.** A cartoon of the vector genome is depicted. **B.** Silver stain analysis revealed pure vector preparations at the indicated viral genomes. **C.** The full to empty capsid ratio of the preparation was >90% as demonstrated by electron microscopy.

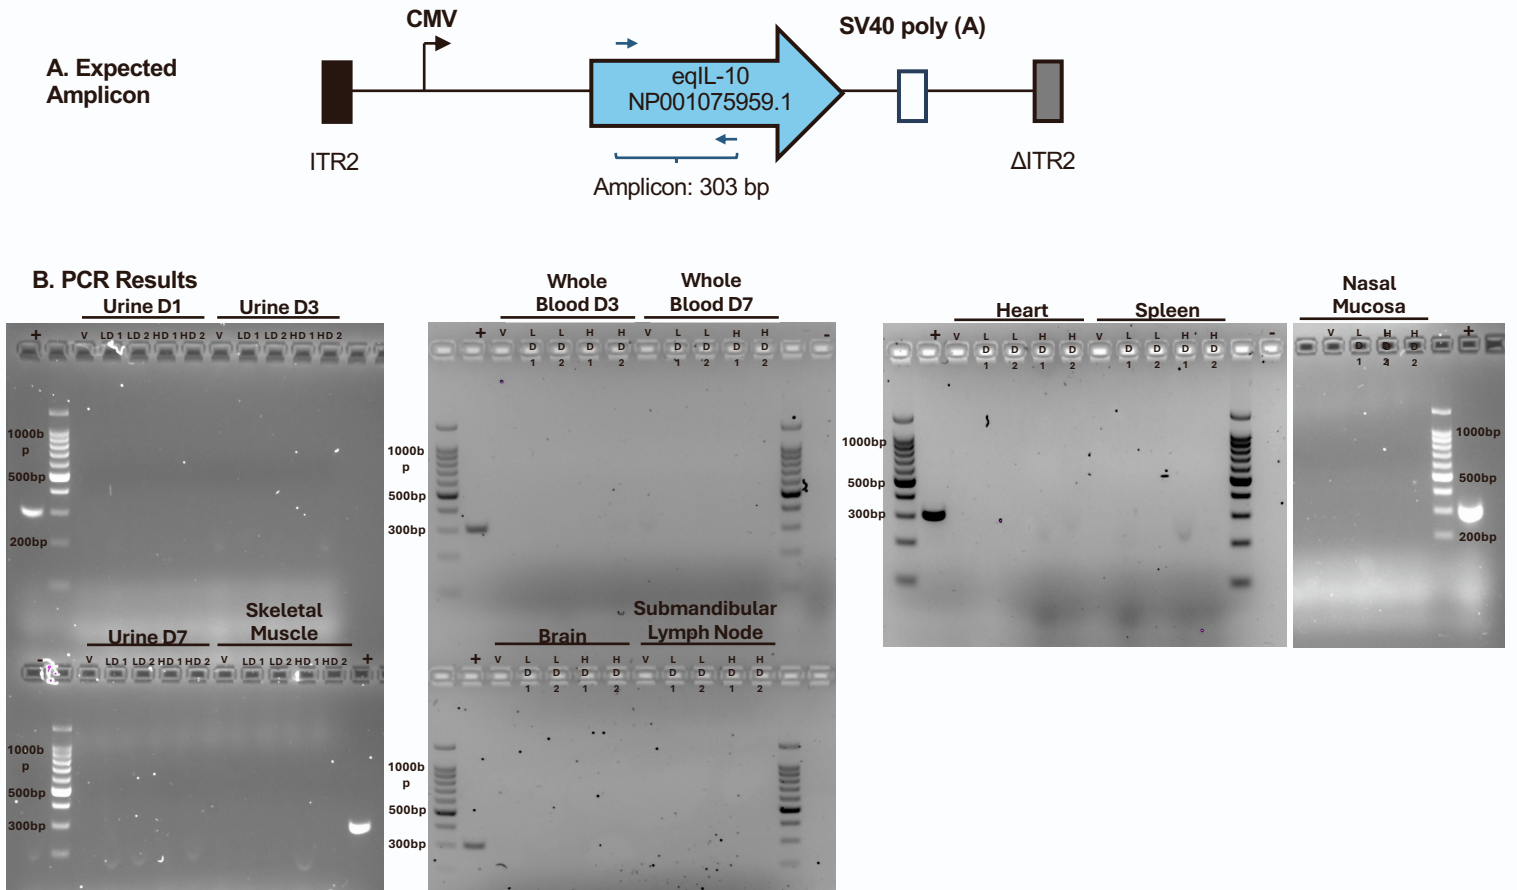

**Figure S4.** Vector Genome Biodistribution. The distribution of AAV8-eqIL-10 viral genomes in peripheral tissues was investigated via endpoint PCR. **A.** The forward and reverse primers annotated on the vector genome. The expected amplicon was 303 bp. **B.** The PCR amplicons were run on an agarose gel and visualized. All tissues from each horse did not have a 303 bp band, indicating that vector genomes were below the limit of detection in the indicated tissues. + = positive control; - = negative control; D = day; V = vehicle-treated; LD = low-dose treated; HD = high-dose treated.
